# Supplementary material for: Quantifying the beliefs of key players in the UK sheep industry on the efficacy of two treatments for footrot
Source: PubMed Central journal article supplement — Vet J. 2018 Sep;239:15–20. doi: 10.1016/j.tvjl.2018.07.009 (PMC6143487; doi:10.1016/j.tvjl.2018.07.009), 2018-09
Supplement: mmc1.pdf [file mmc1.pdf]

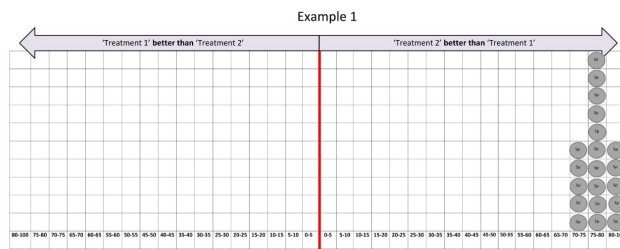

The difference between the cure rates (%)

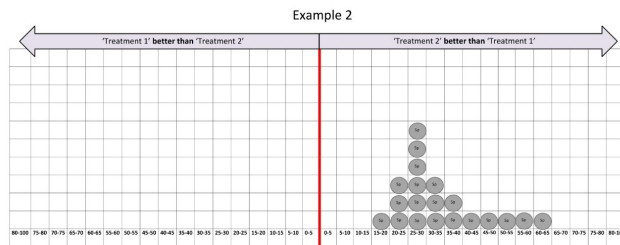

The difference between the cure rates (%)

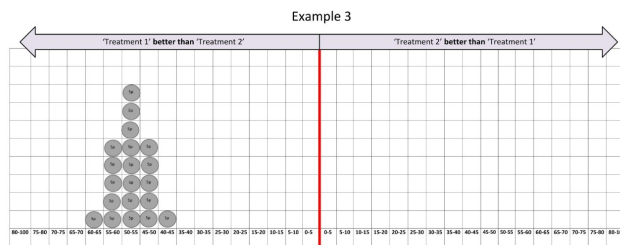

The difference between the cure rates (%)

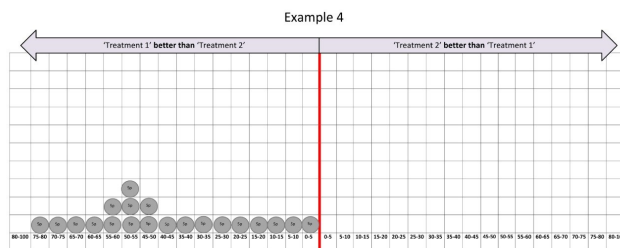

The difference between the cure rates (%)

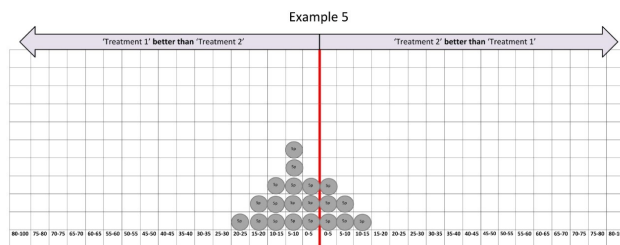

The difference between the cure rates (%)

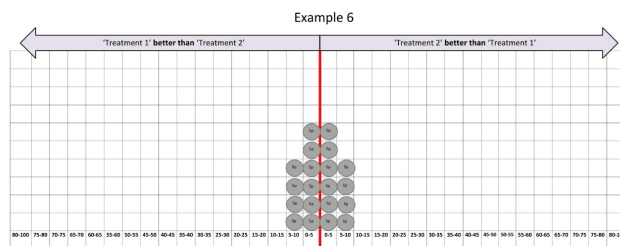

The difference between the cure rates (%)
